# Supplementary material for: Suboptimal Tongue Pressure Is Associated with Risk of Malnutrition in Community-Dwelling Older Individuals
Source: MDPI journal article supplement (doi:10.3390/nu13061821), 2021-05-27
Supplement: s1 [file nutrients-1232943-supplementary.pdf › nutrients-1232943-supplementary.pdf]

**Supplemental Table S1.** The association of risk of malnutrition with low tongue pressure ( $\leq 48$  kPa).

| Risk of Malnutrition | Maximum Tongue Pressure Separated by the Upper Quartile |                                | <i>p</i> Value |
|----------------------|---------------------------------------------------------|--------------------------------|----------------|
|                      | Q1-Q3 ( <i>n</i> = 274)<br>$\leq 48$ kPa                | Q4 ( <i>n</i> = 88)<br>>48 kPa |                |
| Number               | 24                                                      | 2                              | 0.04 *         |
| (percentage)         | (8.75%)                                                 | (2.27%)                        |                |
| Model 1              | 4.17                                                    |                                | 0.05           |
| OR                   | (0.96 to 18.04)                                         | 1.0                            |                |
| (95% CI)             |                                                         |                                |                |
| Model 2              | 3.83                                                    |                                | 0.07           |
| OR                   | (0.88 to 16.65)                                         | 1.0                            |                |
| (95% CI)             |                                                         |                                |                |
| Model 3              | 2.64                                                    |                                | 0.20           |
| OR                   | (0.58 to 11.82)                                         | 1.0                            |                |
| (95% CI)             |                                                         |                                |                |

OR, odds ratio. Model 1: no adjustment. Model 2: adjusted for age and sex. Model 3: adjusted for age, sex, grip strength, skeletal muscle index and gait speed. \*  $p < 0.05$ .
